# Supplementary material for: Solvothermal syntheses, structures, and physical properties of four new coordination compounds constructed from a bent dicarboxylate ligand
Source: Royal Society of Chemistry journal article supplement (doi:10.1039/c0dt00352b), 2010-01-01
Supplement: c0dt00352b.pdf [file c0dt00352b.pdf]

## **Supplementary information**

### **Solvothermal syntheses, structures, and physical properties of four new coordination compounds constructed from a bent dicarboxylate ligand**

**Changchun Ji, Liangfang Huang, Jing Li, Hegen Zheng,\* Yizhi Li, Zijian Guo\***

*State Key Laboratory of Coordination Chemistry, School of Chemistry and Chemical Engineering, Nanjing National Laboratory of Microstructures, Nanjing University, Nanjing 210093, P. R. China, State Key Laboratory of Structural Chemistry, Fujian Institute of Research on the Structure of Matter, Chinese Academy of Sciences, Fuzhou 350002, P. R. China*

\* Corresponding author. E-mail: zhenghg@nju.edu.cn

**Table S1** Selected bond lengths (Å) and angles (deg) for compounds **1-4**

| Compound 1  |            |             |            |
|-------------|------------|-------------|------------|
| Cd1-O8a     | 2.223(4)   | Cd3-O7a     | 2.196(4)   |
| Cd1-O10     | 2.225(4)   | Cd3-O10     | 2.225(4)   |
| Cd1-O2b     | 2.252(4)   | Cd3-O9      | 2.225(4)   |
| Cd1-O6b     | 2.310(4)   | Cd3-O6      | 2.327(4)   |
| Cd1-O3c     | 2.366(4)   | Cd3-O5      | 2.447(4)   |
| Cd1-O11     | 2.392(4)   | Cd3-O1      | 2.474(4)   |
| Cd2-O10     | 2.273(4)   | Cd4-O9      | 2.156(4)   |
| Cd2-O9      | 2.304(4)   | Cd4-O3d     | 2.331(4)   |
| Cd2-O4c     | 2.354(4)   | Cd4-O1      | 2.372(4)   |
| O8a-Cd1-O10 | 95.65(16)  | O9-Cd3-O6   | 119.86(15) |
| O8a-Cd1-O2b | 163.27(16) | O7a-Cd3-O5  | 90.28(16)  |
| O10-Cd1-O2b | 94.75(15)  | O10-Cd3-O5  | 97.95(14)  |
| O8a-Cd1-O6b | 88.78(16)  | O9-Cd3-O5   | 164.84(15) |
| O10-Cd1-O6b | 167.56(14) | O6-Cd3-O5   | 54.70(14)  |
| O2b-Cd1-O6b | 83.79(15)  | O7a-Cd3-O1  | 159.41(17) |
| O8a-Cd1-O3c | 84.39(14)  | O10-Cd3-O1  | 91.28(15)  |
| O10-Cd1-O3c | 87.31(15)  | O9-Cd3-O1   | 75.54(15)  |
| O2b-Cd1-O3c | 109.18(14) | O6-Cd3-O1   | 78.59(15)  |
| O6b-Cd1-O3c | 81.54(14)  | O5-Cd3-O1   | 89.32(14)  |
| O8a-Cd1-O11 | 89.16(16)  | O9f-Cd4-O9  | 180.0      |
| O10-Cd1-O11 | 86.50(15)  | O9-Cd4-O3d  | 90.85(15)  |
| O2b-Cd1-O11 | 78.43(14)  | O9-Cd4-O3g  | 89.15(15)  |
| O6b-Cd1-O11 | 105.23(14) | O3d-Cd4-O3g | 180.00(18) |

---

|                   |            |              |            |
|-------------------|------------|--------------|------------|
| O3c-Cd1-O11       | 170.58(14) | O9f-Cd4-O1   | 101.01(15) |
| O10-Cd2-O10e      | 180.0(3)   | O9-Cd4-O1    | 78.99(15)  |
| O10-Cd2-O9e       | 99.45(15)  | O3d-Cd4-O1   | 97.55(15)  |
| O10-Cd2-O9        | 80.55(15)  | O3g-Cd4-O1   | 82.45(15)  |
| O9e-Cd2-O9        | 180.0(2)   | O1-Cd4-O1f   | 180.0(3)   |
| O10-Cd2-O4d       | 90.46(14)  | Cd4-O1-Cd3   | 92.29(14)  |
| O9-Cd2-O4d        | 100.91(15) | Cd4h-O3-Cd1i | 113.75(15) |
| O10-Cd2-O4c       | 89.54(14)  | Cd1j-O6-Cd3  | 119.02(18) |
| O9-Cd2-O4c        | 79.09(15)  | Cd4-O9-Cd3   | 105.83(16) |
| O4d-Cd2-O4c       | 180.00(16) | Cd4-O9-Cd2   | 114.94(18) |
| O7a-Cd3-O10       | 109.15(17) | Cd3-O9-Cd2   | 97.46(17)  |
| O7a-Cd3-O9        | 103.62(17) | Cd1-O10-Cd3  | 111.34(17) |
| O10-Cd3-O9        | 83.36(15)  | Cd1-O10-Cd2  | 118.05(17) |
| O7a-Cd3-O6        | 84.41(17)  | Cd3-O10-Cd2  | 98.37(15)  |
| O10-Cd3-O6        | 150.41(14) |              |            |
| <b>Compound 2</b> |            |              |            |
| N1-Ni1            | 2.079(3)   | Ni1-O1       | 2.106(2)   |
| Ni1-O4a           | 1.999(3)   | Ni1-O2       | 2.121(3)   |
| Ni1-O3b           | 2.029(2)   | Ni1-N2'c     | 2.15(2)    |
| Ni1-N2c           | 2.08(2)    |              |            |
| O4a-Ni1-O3b       | 101.66(11) | O3b-Ni1-O2   | 160.43(11) |
| O4a-Ni1-N1        | 94.05(12)  | N1-Ni1-O2    | 89.14(11)  |
| O3b-Ni1-N1        | 93.37(11)  | N2c-Ni1-O2   | 88.5(7)    |
| O4a-Ni1-N2c       | 88.0(6)    | O1-Ni1-O2    | 62.11(10)  |
| O3b-Ni1-N2c       | 88.3(7)    | O4a-Ni1-N2'c | 86.0(6)    |
| N1-Ni1-N2c        | 177.1(6)   | O3b-Ni1-N2'c | 87.5(7)    |
| O4a-Ni1-O1        | 159.29(10) | N1-Ni1-N2'c  | 179.2(7)   |

---

---

|                   |            |              |            |
|-------------------|------------|--------------|------------|
| O3b-Ni1-O1        | 98.48(10)  | N2c-Ni1-N2'c | 2.4(11)    |
| N1-Ni1-O1         | 89.52(11)  | O1-Ni1-N2'c  | 90.2(6)    |
| N2c-Ni1-O1        | 87.8(6)    | O2-Ni1-N2'c  | 90.0(6)    |
| O4a-Ni1-O2        | 97.51(10)  |              |            |
| <b>Compound 3</b> |            |              |            |
| Cu1-O5            | 1.888(2)   | Cu1-O4       | 2.351(3)   |
| Cu1-O3a           | 1.963(3)   | Cu2-O5       | 1.810(2)   |
| Cu1-O1            | 1.975(2)   | Cu2-O2       | 1.945(2)   |
| Cu1-N1            | 2.053(3)   |              |            |
| O5-Cu1-O3a        | 91.76(11)  | O1-Cu1-O4    | 98.52(10)  |
| O5-Cu1-O1         | 91.26(11)  | N1-Cu1-O4    | 86.84(11)  |
| O3a-Cu1-O1        | 165.91(11) | O5-Cu2-O5b   | 180.000(1) |
| O5-Cu1-N1         | 178.11(12) | O5-Cu2-O2b   | 88.65(11)  |
| O3a-Cu1-N1        | 86.49(12)  | O5-Cu2-O2    | 91.35(11)  |
| O1-Cu1-N1         | 90.61(12)  | O2b-Cu2-O2   | 180.0(2)   |
| O5-Cu1-O4         | 92.62(9)   | Cu2-O5-Cu1   | 128.13(13) |
| O3a-Cu1-O4        | 95.09(11)  |              |            |
| <b>Compound 4</b> |            |              |            |
| Co1-O1a           | 1.962(3)   | Co1-O6       | 2.039(3)   |
| Co1-O2b           | 1.976(3)   | Co1-O3       | 2.172(3)   |
| Co1-O4c           | 1.999(3)   | Co1-Co1c     | 2.9073(11) |
| O1a-Co1-O2b       | 159.54(14) | O4c-Co1-O3   | 160.57(13) |
| O1a-Co1-O4c       | 93.89(12)  | O6-Co1-O3    | 91.14(12)  |
| O2b-Co1-O4c       | 90.42(14)  | O1a-Co1-Co1c | 82.68(9)   |
| O1a-Co1-O6        | 103.40(12) | O2b-Co1-Co1c | 77.44(10)  |
| O2b-Co1-O6        | 94.26(13)  | O4c-Co1-Co1c | 88.59(10)  |
| O4c-Co1-O6        | 107.78(13) | O6-Co1-Co1c  | 161.85(9)  |

---

---

|            |           |             |          |
|------------|-----------|-------------|----------|
| O1a-Co1-O3 | 85.72(12) | O3-Co1-Co1c | 72.08(8) |
| O2b-Co1-O3 | 83.64(14) |             |          |

---

Symmetry codes: for **1**: (a)  $-x+1, -y+1, -z+1$ ; (b)  $x-1, y, z$ ; (c)  $x-1, y-1, z$ ; (d)  $-x+1, -y+2, -z$ ; (e)  $-x, -y+1, -z$ ; (f)  $-x+1, -y+1, -z$ ; (g)  $x, y-1, z$ ; (h)  $x, y+1, z$ ; (i)  $x+1, y+1, z$ ; (j)  $x+1, y, z$ ; for **2**: (a)  $x, y, z+1$ ; (b)  $-x+2, -y+1, -z+1$ ; (c)  $x, y+1, z$ ; for **3**: (a)  $-x+2, -y, -z+1$ ; (b)  $-x+2, -y+1, -z+1$ ; for **4**: (a)  $-x+1, y-1, -z+3/2$ ; (b)  $x, -y+2, z-1/2$ ; (c)  $-x+1, -y+1, -z+1$ .

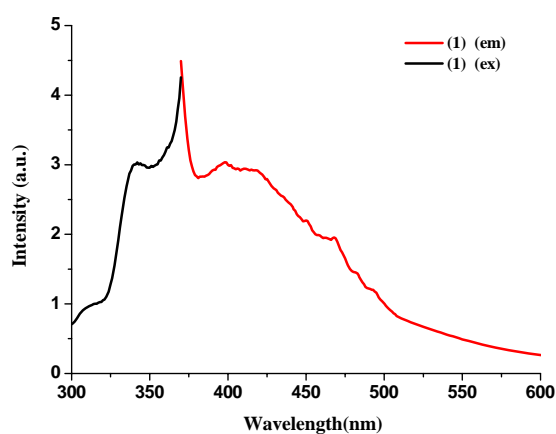

**Figure S1.** Excitation (left) and emission spectra (right, excited at 340 nm) of compound **1** at room temperature.

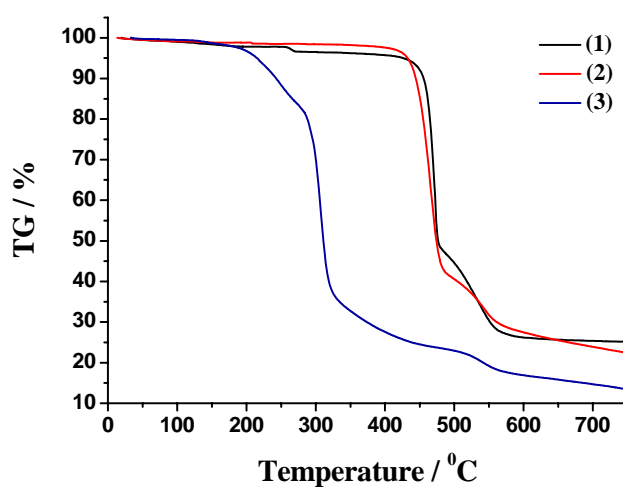

**Figure S2.** TGA curves of compounds **1** - **3**.

### Thermal analysis and PXRD measurements

To characterize the compounds more fully in terms of thermal stability, their thermal behaviors were studied by TGA (Fig. S2). For compound **1**, a little weight loss is observed from 20 to 261 °C which is attributed to the loss of the coordinated water and the lattice water, with a weight loss of 2.97 % (calcd 3.03 %), then the structure was decomposed since 430 °C. The TGA curve of **2** shows the network of compound **2** was decomposed quickly after 420 °C. Comparably, compound **3** is less stable with the weight loss of two lattice DMF and one bipy molecules 22.9% (calcd 23.1%) between 180 °C and 291 °C, and then the framework was decomposed. To confirm whether the crystal structures are truly representative of the bulk materials, PXRD experiments were carried out for **1** - **3**. The PXRD experimental and computer-simulated patterns of the corresponding compounds are shown in the Supporting Information, Figures S3-S5, and they show that the bulk synthesized materials and the measured single crystals are the same.

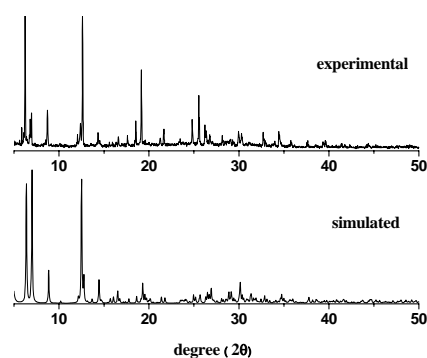

**Figure S3.** Powder X-ray diffraction patterns of compound **1**

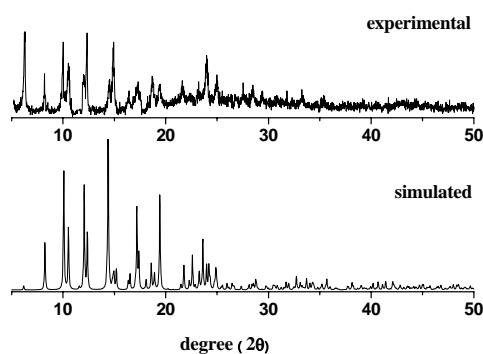

**Figure S4.** Powder X-ray diffraction patterns of compound **2**

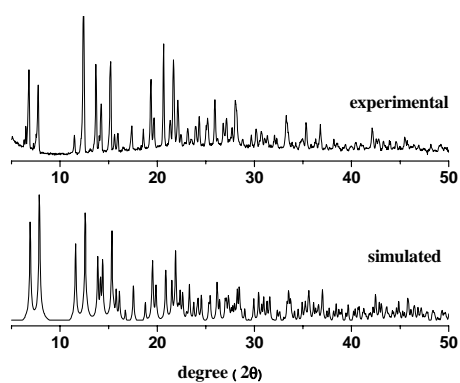

**Figure S5.** Powder X-ray diffraction patterns of compound **3**
